# Supplementary material
Source: PubMed Central journal article supplement (PMC5191939)
Supplement: NIHMS827553-supplement-2.pdf [file NIHMS827553-supplement-2.pdf]

Corresponding Author: H. Troy Ghashghaei

Manuscript Number: NN-BC55103

Manuscript Type: Brief Communication

# Main Figures: 3

# Supplementary Figures: 10

# Supplementary Tables: 0

# Supplementary Videos: 0

## Reporting Checklist for Nature Neuroscience

This checklist is used to ensure good reporting standards and to improve the reproducibility of published results. For more information, please read [Reporting Life Sciences Research](#).

Please note that in the event of publication, it is mandatory that authors include all relevant methodological and statistical information in the manuscript.

### ► Statistics reporting, by figure

- Please specify the following information for each panel reporting quantitative data, and where each item is reported (section, e.g. Results, & paragraph number).
- Each figure legend should ideally contain an exact sample size (n) for each experimental group/condition, where n is an exact number and not a range, a clear definition of how n is defined (for example x cells from x slices from x animals from x litters, collected over x days), a description of the statistical test used, the results of the tests, any descriptive statistics and clearly defined error bars if applicable.
- For any experiments using custom statistics, please indicate the test used and stats obtained for each experiment.
- Each figure legend should include a statement of how many times the experiment shown was replicated in the lab; the details of sample collection should be sufficiently clear so that the replicability of the experiment is obvious to the reader.
- For experiments reported in the text but not in the figures, please use the paragraph number instead of the figure number.

**Note:** Mean and standard deviation are not appropriate on small samples, and plotting independent data points is usually more informative. When technical replicates are reported, error and significance measures reflect the experimental variability and not the variability of the biological process; it is misleading not to state this clearly.

| FIGURE NUMBER           | TEST USED       |                       | n            |                                    |                       | DESCRIPTIVE STATS (AVERAGE, VARIANCE) |                       | P VALUE     |                       | DEGREES OF FREEDOM & F/t/z/R/ETC VALUE |                       |
|-------------------------|-----------------|-----------------------|--------------|------------------------------------|-----------------------|---------------------------------------|-----------------------|-------------|-----------------------|----------------------------------------|-----------------------|
|                         | WHICH TEST?     | SECTION & PARAGRAPH # | EXACT VALUE  | DEFINED?                           | SECTION & PARAGRAPH # | REPORTED?                             | SECTION & PARAGRAPH # | EXACT VALUE | SECTION & PARAGRAPH # | VALUE                                  | SECTION & PARAGRAPH # |
| example 1a              | one-way ANOVA   | Fig. legend           | 9, 9, 10, 15 | mice from at least 3 litters/group | Methods para 8        | error bars are mean +/- SEM           | Fig. legend           | p = 0.044   | Fig. legend           | F(3, 36) = 2.97                        | Fig. legend           |
| example results, para 6 | unpaired t-test | Results para 6        | 15           | slices from 10 mice                | Results para 6        | error bars are mean +/- SEM           | Results para 6        | p = 0.0006  | Results para 6        | t(28) = 2.808                          | Results para 6        |

| TEST USED     |             | n                                        |                                      |                      | DESCRIPTIVE STATS (AVERAGE, VARIANCE) |                                    | P VALUE                                                                                                                                                                                                                                                                                                                                                                                                                                                                                                                                                 |                 | DEGREES OF FREEDOM & F/t/z/R/ETC VALUE                                                                                                                                                                                                     |                 |                       |                 |
|---------------|-------------|------------------------------------------|--------------------------------------|----------------------|---------------------------------------|------------------------------------|---------------------------------------------------------------------------------------------------------------------------------------------------------------------------------------------------------------------------------------------------------------------------------------------------------------------------------------------------------------------------------------------------------------------------------------------------------------------------------------------------------------------------------------------------------|-----------------|--------------------------------------------------------------------------------------------------------------------------------------------------------------------------------------------------------------------------------------------|-----------------|-----------------------|-----------------|
| FIGURE NUMBER | WHICH TEST? | SECTION & PARAGRAPH #                    | EXACT VALUE                          | DEFINED?             | SECTION & PARAGRAPH #                 | REPORTED?                          | SECTION & PARAGRAPH #                                                                                                                                                                                                                                                                                                                                                                                                                                                                                                                                   | EXACT VALUE     | SECTION & PARAGRAPH #                                                                                                                                                                                                                      | VALUE           | SECTION & PARAGRAPH # |                 |
| +<br>-        | 1c          | unpaired two tailed t-test               | Figure 1 legend                      | 3 animals per group  | P42-Gi mice from at least 3 litters   | Figure 1 legend and online methods | Dot plot of mean from each animal, lines are mean $\pm$ s.e.m. of percentages from the three replicates, vehicle: 42.2 $\pm$ 5.5%, CNO: 20.1 $\pm$ 2.1%                                                                                                                                                                                                                                                                                                                                                                                                 | Figure 1 legend | p=0.02                                                                                                                                                                                                                                     | Figure 1 legend | t(4)=3.72             | Figure 1 legend |
| +<br>-        | 2b          | Fisher's Exact Test (all trials)         | Figure 2 legend                      | 10 animals per group | P42-Gi mice from at least 3 litters   | Figure 2 legend and online methods | Percent and exact number of successful trials/all trials. Treat A: Vehicle: 60% (42/70); CNO: 13%(9/70). Treat B: Vehicle: 67% (47/70); CNO: 13% (9/70) .                                                                                                                                                                                                                                                                                                                                                                                               | Figure 2 legend | Treat A: P=7.6x10 <sup>-9</sup><br>Treat B: P=4.4x10 <sup>-11</sup>                                                                                                                                                                        | Figure 2 legend | NA                    | NA              |
| +<br>-        | 2c          | Fisher's Exact Test (daily comparisons ) | Analyses not presented in manuscript | 10 animals per group | P42-Gi mice from at least 3 litters   | Figure 2 legend and online methods | All values plotted in charts. Exact number of successful trials/all trials per day. Treat A: Day 1: vehicle=2/10, CNO=0/10; day 2: vehicle=6/10, CNO=1/10; day 3: vehicle=6/10, CNO=2/10; day 4: vehicle=5/10, CNO=1/10; day 5: vehicle=8/10, CNO=2/10; day 6: vehicle=8/10, CNO=2/10; day 7: vehicle=8/10, CNO=1/10. Treat B: Day 1: vehicle=4/10, CNO=2/10; day 2: vehicle=4/10, CNO=2/10; day 3: vehicle=6/10, CNO=0/10; day 4: vehicle=6/10, CNO=1/10; day 5: vehicle=9/10, CNO=1/10; day 6: vehicle=9/10, CNO=2/10; day 7: vehicle=9/10, CNO=1/10. | Figure 2 legend | Treat A: day 1: p=0.47, day 2: p=0.14, day 3: p=0.17, day 4: p=0.35, day 5: p=0.023, day 6: p=0.023, day 7: p=0.005. Treat B: day 1: p=0.63, day 2: p=0.63, day 3: p=0.011, day 4: p=0.057, day 5: p=0.001, day 6: p=0.006, day 7: p=0.001 | Figure 2 legend | NA                    | NA              |

|        |    |                                          |                 |                      |                                     |                                    |                                                                                                                                                                                                                                                                                                                         |                 |                                                                                                   |                 |                                                   |                 |
|--------|----|------------------------------------------|-----------------|----------------------|-------------------------------------|------------------------------------|-------------------------------------------------------------------------------------------------------------------------------------------------------------------------------------------------------------------------------------------------------------------------------------------------------------------------|-----------------|---------------------------------------------------------------------------------------------------|-----------------|---------------------------------------------------|-----------------|
| +<br>- | 2c | Hypothesis test of Linear Regression     | Figure 2 legend | 10 animals per group | P42-Gi mice from at least 3 litters | Figure 2 legend and online methods | Data are presented as slope $\pm$ s.e.with 95% CI (LL,UL)<br>slope(vehicle): Treat A = $-8.9 \pm 2.77\%/day$ (-14.45, -3.4); Treat B = $-10.0 \pm 1.56\%/day$ (-15.15, -4.85); slope(CNO): Treat A = $-1.79 \pm 2.02\%/day$ (-5.82, 2.25), Treat B = $0.71 \pm 1.5\%/day$ (-3.34, 4.76)                                 | Figure 2 legend | Treat A: P=0.039 Treat B: P=0.0014                                                                | Figure 2 legend | Treat A: F(1,136)=4.35<br>Treat B: F(1,136)=10.68 | Figure 2 legend |
| +<br>- | 2d | Fisher's Exact Test (all trials)         | Figure 2 legend | 9 animals per group  | P42-Gi mice from at least 3 litters | Figure 2 legend and online methods | Percent and exact values of trials with freezing behavior/all trials. Vehicle:89% (56/63); CNO: 87% (55/63)                                                                                                                                                                                                             | Figure 2 legend | P=0.999                                                                                           | Figure 2 legend | NA                                                | NA              |
| +<br>- | 2e | Fisher's Exact Test (daily comparisons ) | Figure 2 legend | 9 animals per group  | P42-Gi mice from at least 3 litters | Figure 2 legend and online methods | All values plotted in chart. Exact values of trials with freezing behavior/all trials per day between groups. Day 1: vehicle=9/9 CNO=9/9; day 2: vehicle=9/9, CNO=9/9; day 3: vehicle=9/9, CNO=8/9; day 4: vehicle=9/9, CNO=9/9; day 5: vehicle=8/9, CNO=7/9; day 6: vehicle=7/9, CNO=7/9; day 7: vehicle=6/9, CNO=7/9. | Figure 2 legend | day 1: P=1.0, day 2: P=1.0, day 3: P=1.0, day 4: P=1.0, day 5: P=1.0, day 6: P=1.0, day 7: P=1.0. | Figure 2 legend | NA                                                | NA              |
| +<br>- | 2e | Hypothesis test of Linear Regression     | Figure 2 legend | 9 animals per group  | P42-Gi mice from at least 3 litters | Figure 2 legend and online methods | Data are presented as slope $\pm$ s.e.with 95% CI (LL,UL)<br>slope(vehicle)= $6.75 \pm 1.82\%/day$ (3.11, 10.38); slope(CNO)= $5.56 \pm 2.1\%/day$ (1.54, 9.57)                                                                                                                                                         | Figure 2 legend | P=0.66                                                                                            | Figure 2 legend | F(1,122)=0.19                                     | Figure 2 legend |

|        |    |                                         |                 |                     |                                                                                    |                                    |                                                                                                                                                                                                                                                                                                                                           |                 |                                                                                                           |                 |                                       |                 |
|--------|----|-----------------------------------------|-----------------|---------------------|------------------------------------------------------------------------------------|------------------------------------|-------------------------------------------------------------------------------------------------------------------------------------------------------------------------------------------------------------------------------------------------------------------------------------------------------------------------------------------|-----------------|-----------------------------------------------------------------------------------------------------------|-----------------|---------------------------------------|-----------------|
| +<br>- | 2f | Two-tailed Mann-Whitney U test          | Figure 2 legend | 9 animals per group | P42-Gi mice from at least 3 litters                                                | Figure 2 legend and online methods | All values plotted in chart. Data below are in the following order: mean± s.e.m of percentages; Q1, median, Q3. By animal: vehicle: 193.3±42.1s; 83.1, 146.9, 281.9; CNO: 203.3±41.7s; 83, 216.1, 295.9; N(vehicle)=N(CNO)=9. By day: vehicle: 193.3 ±5.3s, 183, 186.6, 205.8; CNO: 203.3 ±7.2s; 190.0, 210.7, 213.7; N(vehicle)=N(CNO)=7 | Figure 2 legend | By day: P=0.26<br>By animal: P=0.96                                                                       | Figure 2 legend | By day: U=15.00<br>By animal: U=39.50 | Figure 2 legend |
| +<br>- | 2f | Hypothesis test of Linear Regression    | Figure 2 legend | 9 animals per group | P42-Gi mice from at least 3 litters                                                | Figure 2 legend and online methods | Data are presented as slope ± s.e.with 95% CI (LL,UL) slope(vehicle)=-1.36±8.55s/day (-18.44, 15.73); slope(CNO)=-8.1 ±8.00s/day (-24.12, 7.88)                                                                                                                                                                                           | Figure 2 legend | P=0.56                                                                                                    | Figure 2 legend | F(1,122)=0.33                         | Figure 2 legend |
| +<br>- | 3b | None                                    | NA              | 3 animals per group | P0-Gi and P42-Gi forebrains, 3 animals/group, 18 sections per animal, respectively | Figure 3 legend and online methods | dot plot of mean per animal, lines are mean±s.e.m.                                                                                                                                                                                                                                                                                        | Figure 3 legend | NA                                                                                                        | NA              | NA                                    | NA              |
| +<br>- | 3c | None                                    | NA              | 3 animals per group | P0-Gi and P42-Gi forebrains, 3 animals/group, 18 sections per animal, respectively | Figure 3 legend and online methods | dot plot of mean per animal, lines are mean±s.e.m.                                                                                                                                                                                                                                                                                        | Figure 3 legend | NA                                                                                                        | NA              | NA                                    | NA              |
| +<br>- | 3e | Fisher's Exact Test (all trials)        | Figure 3 legend | 9 animals per group | P0-Gi mice from at least 3 litters                                                 | Figure 3 legend and online methods | Exact proportion freezing trials/all trials Vehicle: 94% (59/63); CNO: 27% (17/63)                                                                                                                                                                                                                                                        | Figure 3 legend | P=2.99x10 <sup>-15</sup>                                                                                  | Figure 3 legend | NA                                    | NA              |
| +<br>- | 3f | Fisher's Exact Test (daily comparisons) | Figure 3 legend | 9 animals per group | P0-Gi mice from at least 3 litters                                                 | Figure 3 legend and online methods | All values plotted in chart. Exact values of trials with freezing behavior/all trials per day between groups. Day 1: vehicle=9/9, CNO=2/9; day 2: vehicle=9/9, CNO=2/9; day 3: vehicle=9/9, CNO=2/9; day 4: vehicle=9/9, CNO=4/9; day 5: vehicle=9/9, CNO=3/9; day 6: vehicle=8/9, CNO=2/9; day 7: vehicle=6/9, CNO=2/9.                  | Figure 3 legend | day 1: P=0.005, day 2: P=0.005, day 3: P=0.005, day 4: P=0.06 day 5: P=0.02, day 6: P=0.02, day 7: P=0.17 | Figure 3 legend | NA                                    | NA              |

|        |    |                                         |                 |                     |                                    |                                    |                                                                                                                                                                                                                                                                                                                                                                          |                 |                                                                                                             |                 |                              |                 |
|--------|----|-----------------------------------------|-----------------|---------------------|------------------------------------|------------------------------------|--------------------------------------------------------------------------------------------------------------------------------------------------------------------------------------------------------------------------------------------------------------------------------------------------------------------------------------------------------------------------|-----------------|-------------------------------------------------------------------------------------------------------------|-----------------|------------------------------|-----------------|
| +<br>- | 3f | Hypothesis test of Linear Regression    | Figure 3 legend | 9 animals per group | PO-Gi mice from at least 3 litters | Figure 3 legend and online methods | Data are presented as slope $\pm$ s.e.with 95% CI (LL,UL) slope(vehicle)=3.18 $\pm$ 1.30%/day (0.57, 5.78); slope(CNO)=-0.40 $\pm$ 2.84%/day (-6.08, 5.29)                                                                                                                                                                                                               | Figure 3 legend | P=0.26                                                                                                      | Figure 3 legend | F(1,122)=1.31                | Figure 3 legend |
| +<br>- | 3g | Two-tailed Mann-Whitney U test          | Figure 3 legend | 9 animals per group | PO-Gi mice from at least 3 litters | Figure 3 legend and online methods | All values plotted in chart. Data below are in the following order: mean $\pm$ s.e.m of percentages; Q1, median, Q3. By day: vehicle: 252.6 $\pm$ 9.5s; 237.3, 245.3, 276.1; CNO: 144.4 $\pm$ 5.8s; 133.2, 148.4,157.0; N(vehicle)=N(CNO)=7. By animal: vehicle: 252.6 $\pm$ 27s; 207.6, 242.1, 283.4; CNO:144.4 $\pm$ 25.77s; 93.21, 112.1, 168.6; N(vehicle)=N(CNO)=9. | Figure 3 legend | By day: P=0.0006, By animal: P=0.0078                                                                       | Figure 3 legend | By day: U=0; By animal: U=11 | Figure 3 legend |
| +<br>- | 3g | Hypothesis test of Linear Regression    | Figure 3 legend | 9 animals per group | PO-Gi mice from at least 3 litters | Figure 3 legend and online methods | Data are presented as slope $\pm$ s.e.with 95% CI (LL,UL) slope(vehicle):-10.64 $\pm$ 5.78s/day (-22.2, 0.92), slope(CNO):3.66 $\pm$ 5.4s/day (-7.08, 14.39)                                                                                                                                                                                                             | Figure 3 legend | P=0.072                                                                                                     | Figure 3 legend | F(1,122)=3.28                | Figure 3 legend |
| +<br>- | 3h | Fisher's Exact Test (all trials)        | Figure 3 legend | 6 animals per group | PO-Gi mice from at least 3 litters | Figure 3 legend and online methods | Exact proportion successful trials/all trials Vehicle: 74% (31/42); CNO: 71% (30/42)                                                                                                                                                                                                                                                                                     | Figure 3 legend | P=0.99                                                                                                      | Figure 3 legend | NA                           | NA              |
| +<br>- | 3i | Fisher's Exact Test (daily comparisons) | Figure 3 legend | 6 animals per group | PO-Gi mice from at least 3 litters | Figure 3 legend and online methods | All values plotted in chart. Exact proportion successful trials/all trials between groups per day. Day 1: vehicle=0/6, CNO=2/6; day 2: vehicle=4/6, CNO=3/6; day 3: vehicle=6/6, CNO=5/6; day 4: vehicle=5/6, CNO=6/6; day 5: vehicle=5/6, CNO=4/6; day 6: vehicle=5/6, CNO=6/6; day 7: vehicle=6/6, CNO=4/6.                                                            | Figure 3 legend | day 1: P=0.45, day 2: P=0.999, day 3: P=0.999, day 4: P=0.999 day 5: P=0.999, day 6: P=0.999, day 7: P=0.45 | Figure 3 legend | NA                           | NA              |

|        |     |                                      |                               |                     |                                                                 |                                                  |                                                                                                                                                                                                                                                                                                                                                                                                                                                                                                                                                                                                                      |                               |                                                                 |                               |                                                                         |                               |
|--------|-----|--------------------------------------|-------------------------------|---------------------|-----------------------------------------------------------------|--------------------------------------------------|----------------------------------------------------------------------------------------------------------------------------------------------------------------------------------------------------------------------------------------------------------------------------------------------------------------------------------------------------------------------------------------------------------------------------------------------------------------------------------------------------------------------------------------------------------------------------------------------------------------------|-------------------------------|-----------------------------------------------------------------|-------------------------------|-------------------------------------------------------------------------|-------------------------------|
| +<br>- | 3i  | Hypothesis test of Linear Regression | Figure 3 legend               | 6 animals per group | P0-Gi mice from at least 3 litters                              | Figure 3 legend and online methods               | Data are presented as slope $\pm$ s.e. with 95% CI (LL,UL) Slope (vehicle): $-11.31 \pm 2.98\%/day$ ( $-17.33, -5.29$ ); slope (CNO): $-6.55 \pm 3.42\%/day$ ( $-13.46, 0.36$ )                                                                                                                                                                                                                                                                                                                                                                                                                                      | Figure 3 legend               | P=0.30                                                          | Figure 3 legend               | F(1,80)=1.10                                                            | Figure 3 legend               |
| +<br>- | S1c | None                                 | NA                            | 3 animals per group | P42 Gi mice from at least 3 litters, 100 EGFP+ cells per animal | Supplementary Figure 1 legend and online methods | dot plots are average per animal and lines are mean $\pm$ s.e.m.                                                                                                                                                                                                                                                                                                                                                                                                                                                                                                                                                     | Supplementary Figure 1 legend | NA                                                              | NA                            | NA                                                                      | NA                            |
| +<br>- | S2b | Two-tailed Mann-Whitney U test       | Supplementary Figure 2 legend | 6 animals per group | P42 Gi mice from at least 3 litters                             | Supplementary Figure 2 legend and online methods | Data presented as dot plot for individual animals with lines indicating mean $\pm$ s.e.m. Data below are in the following order: mean $\pm$ s.e.m, Q1, median, Q3. Mobile- vehicle: $86.83 \pm 2.56\%$ ; $81.71, 87.33, 92.71$ ; CNO: $82.56 \pm 3.74\%$ ; $75.51, 83.17, 90.89$ . Rearing- vehicle: $13.35 \pm 2.5\%$ ; $9.60, 11.44, 17.59$ ; CNO: $30.8 \pm 9.35\%$ ; $10.74, 27.83, 48.94$ Grooming- vehicle: $9.83 \pm 2.00\%$ ; $5.84, 8.24, 15.06$ ; CNO: $9.03 \pm 2.25\%$ ; $4.27, 7.30, 15.08$ Digging- vehicle: $20.54 \pm 2.85\%$ ; $15.48, 20.07, 26.74$ ; CNO: $21.36 \pm 5.13\%$ ; $10.16, 18, 33.58$ | Supplementary Figure 2 legend | Mobile: P=0.39; Rearing: P=0.23; Grooming: P=0.63; Digging: P=1 | Supplementary Figure 2 legend | Mobile: U=12.00; Rearing: U=10.00; Grooming: U=14.50; Digging: U=18.00; | Supplementary Figure 2 legend |
| +<br>- | S3b | Fisher's Exact Test (all trials)     | Supplementary Figure 3 legend | 6 animals per group | 10 week old Nestin-cre mice without AAV2-Gi injections          | Supplementary Figure 3 legend and online methods | Percent and exact number of successful trials/all trials. Vehicle: 83% (35/42), CNO: 88% (37/42)                                                                                                                                                                                                                                                                                                                                                                                                                                                                                                                     | Supplementary Figure 3 legend | P=0.76                                                          | Supplementary Figure 3 legend | NA                                                                      | NA                            |

|        |     |                                         |                               |                     |                                                        |                                                  |                                                                                                                                                                                                                                                                                                                         |                                                  |                                                                                                   |                               |               |                               |
|--------|-----|-----------------------------------------|-------------------------------|---------------------|--------------------------------------------------------|--------------------------------------------------|-------------------------------------------------------------------------------------------------------------------------------------------------------------------------------------------------------------------------------------------------------------------------------------------------------------------------|--------------------------------------------------|---------------------------------------------------------------------------------------------------|-------------------------------|---------------|-------------------------------|
| +<br>- | S3c | Fisher's Exact Test (daily comparisons) | Supplementary Figure 3 legend | 6 animals per group | 10 week old Nestin-cre mice without AAV2-Gi injections | Supplementary Figure 3 legend and online methods | All values plotted in chart. Percent and exact number of successful trials/all trials. Day 1: vehicle=4/6,CNO=3/6; day 2: vehicle=3/6, CNO=5/6; day 3: vehicle=6/6, CNO=6/6; day 4: vehicle=4/6, CNO=5/6; day 5: vehicle=6/6, CNO=6/6; day 6: vehicle=6/6, CNO=6/6; day 7: vehicle=6/6, CNO=6/6.                        | Supplementary Figure 3 legend                    | day 1: P=0.999, day 2: P=0.55, day 3: P=1, day 4: P=0.999, day 5=day 6=day 7: P=1                 | Supplementary Figure 3 legend | NA            | NA                            |
| +<br>- | S3c | Hypothesis test of Linear Regression    | Supplementary Figure 3 legend | 6 animals per group | 10 week old Nestin-cre mice without AAV2-Gi injections | Supplementary Figure 3 legend and online methods | Data are presented as slope $\pm$ s.e.with 95% CI (LL,UL) Slope (vehicle): $-7.14 \pm 2.72\%/day$ (-12.64, 1.64), slope (CNO): $-6.55 \pm 2.34\%/day$ (-11.28, -1.82)                                                                                                                                                   | Supplementary Figure 3 legend                    | P=0.87                                                                                            | Supplementary Figure 3 legend | F(1,80)=0.027 | Supplementary Figure 3 legend |
| +<br>- | S3e | None-all trials successful              | NA                            | 6 animals per group | P42 Gi mice from at least 3 litters                    | Supplementary Figure 3 legend and online methods | bar charts of successful/failed trials                                                                                                                                                                                                                                                                                  | Supplementary Figure 3 legend and online methods | NA                                                                                                | NA                            | NA            | NA                            |
| +<br>- | S4b | Fisher's Exact Test (all trials)        | Supplementary Figure 4 legend | 6 animals per group | 10 week old Nestin-cre mice without AAV2-Gi injections | Supplementary Figure 4 legend and online methods | Exact proportion freezing trials/all trials Vehicle: 83% (35/42), CNO: 86% (36/42)                                                                                                                                                                                                                                      | Supplementary Figure 4 legend                    | P=0.999                                                                                           | Supplementary Figure 4 legend | NA            | NA                            |
| +<br>- | S4c | Fisher's Exact Test (daily comparisons) | Supplementary Figure 4 legend | 6 animals per group | 10 week old Nestin-cre mice without AAV2-Gi injections | Supplementary Figure 4 legend and online methods | All values plotted in chart. Exact values of trials with freezing behavior/all trials per day between groups. Day 1: vehicle=6/6, CNO=6/6; day 2:vehicle=6/6, CNO=6/6; day 3: vehicle=6/6, CNO=6/6; day 4: vehicle=6/6, CNO=6/6; day 5: vehicle=4/6, CNO=5/6; day 6: vehicle=4/6, CNO=3/6; day 7: vehicle=3/6, CNO=4/6. | Supplementary Figure 4 legend                    | day 1: P=1.0, day 2: P=1.0, day 3: P=1.0, day 4: P=1.0, day 5: P=1.0, day 6: P=1.0, day 7: P=1.0. | Supplementary Figure 4 legend | NA            | NA                            |

|        |      |                                      |                               |                     |                                                         |                                                   |                                                                                                                                                                                                                                                                                                                                                                                                                                                                                                                                                                                                 |                                |                                                                    |                               |                                                                        |                               |
|--------|------|--------------------------------------|-------------------------------|---------------------|---------------------------------------------------------|---------------------------------------------------|-------------------------------------------------------------------------------------------------------------------------------------------------------------------------------------------------------------------------------------------------------------------------------------------------------------------------------------------------------------------------------------------------------------------------------------------------------------------------------------------------------------------------------------------------------------------------------------------------|--------------------------------|--------------------------------------------------------------------|-------------------------------|------------------------------------------------------------------------|-------------------------------|
| +<br>- | S4c  | Hypothesis test of Linear Regression | Supplementary Figure 4 legend | 6 animals per group | 10 week old Nestin-cre mice without AAV2-Gi injections  | Supplementary Figure 4 legend and online methods  | Data are presented as slope $\pm$ s.e.with 95% CI (LL,UL) Slope (vehicle): 8.93 $\pm$ 2.59%/day (3.7, 14.15); slope (CNO): 7.74 $\pm$ 2.48%/day (2.72, 12.75)                                                                                                                                                                                                                                                                                                                                                                                                                                   | Supplementary Figure 4 legend  | P=0.74                                                             | Supplementary Figure 4 legend | F(1,80)=0.11                                                           | Supplementary Figure 4 legend |
| +<br>- | S7b  | Two-tailed Mann-Whitney U test       | Supplementary Figure 7 legend | 6 animals per group | P0-Gi mice from at least 3 litters                      | Supplementary Figure 7 legend and online methods  | Data presented as dot plot for individual animals with lines indicating mean $\pm$ s.e.m. Data below are in the following order: mean $\pm$ s.e.m, Q1, median, Q3. Mobile - vehicle: 83.01 $\pm$ 3.62%, 74.24, 81.96, 92.86; CNO: 85.39 $\pm$ 3.43%; 77.47, 87.41, 92.19; Rearing - vehicle: 16.69 $\pm$ 1.87%; 13.44, 15.65, 20.96; CNO: 16.22 $\pm$ 1.96%, 11.28, 16.37, 21.44. Grooming - vehicle: 13.71 $\pm$ 2.55%; 8.97, 11.94, 19.06; CNO: 15.2 $\pm$ 1.29%; 13.09, 14.41, 18.66. Digging - vehicle: 17.1 $\pm$ 2.74%; 10.92, 15.22, 24.52; CNO: 17.43 $\pm$ 2.95%, 10.96, 17.48, 23.87. | Supplementary Figure 7 legend  | Mobile: P=0.82; Rearing: P=0.94; Grooming: P=0.30; Digging: P=0.94 | Supplementary Figure 7 legend | Mobile: U=16.00; Rearing: U=17.00; Grooming: U=11.00; Digging: U=17.00 | Supplementary Figure 7 legend |
| +<br>- | S8c  | Two-tailed Mann-Whitney U test       | Supplementary Figure 8 legend | 6 animals per group | P0-Gi mice from at least 3 litters                      | Supplementary Figure 8 legend and online methods  | All values plotted in chart in supplementary figure 8b Data below are in the following order: mean $\pm$ s.e.m of percentages; Q1, median, Q3. Vehicle: 72.4 $\pm$ 3.8%; 65.41, 67.23, 83.41; CNO: 70.8 $\pm$ 7.4%; 65.41, 67.23, 83.41.                                                                                                                                                                                                                                                                                                                                                        | Supplementary Figure 8 legend  | P=0.90                                                             | Supplementary Figure 8 legend | U=23                                                                   | Supplementary Figure 8 legend |
| +<br>- | S9c  | None                                 | NA                            | 3 animals per group | P0-Gi and P42-Gi mice                                   | Supplementary Figure 9 legend and online methods  | dot plots are percentage calculated per mouse, lines indicate mean $\pm$ s.e.m                                                                                                                                                                                                                                                                                                                                                                                                                                                                                                                  | Supplementary Figure 9 legend  | NA                                                                 | NA                            | NA                                                                     | NA                            |
| +<br>- | S10c | None                                 | NA                            | 3 animals per group | P0-Gi and P42-Gi mice; 100 double labeled cells/ animal | Supplementary Figure 10 legend and online methods | dot plots are percentage calculated per mouse, lines indicate mean $\pm$ s.e.m                                                                                                                                                                                                                                                                                                                                                                                                                                                                                                                  | Supplementary Figure 10 legend | NA                                                                 | NA                            | NA                                                                     | NA                            |





- |                                                                                                                                                                                                                                              |                                                                                                  |
|----------------------------------------------------------------------------------------------------------------------------------------------------------------------------------------------------------------------------------------------|--------------------------------------------------------------------------------------------------|
| <p>3. Are criteria for excluding data points reported?<br/>Was this criterion established prior to data collection?<br/>Where is this described (section, paragraph #)?</p>                                                                  | <p>No data were excluded. This is indicated in Online Methods, Data analyses and statistics.</p> |
| <p>4. Define the method of randomization used to assign subjects (or samples) to the experimental groups and to collect and process data.<br/>If no randomization was used, state so.<br/>Where does this appear (section, paragraph #)?</p> | <p>Randomized cell counting is described in Online Methods, Data analyses and statistics.</p>    |
| <p>5. Is a statement of the extent to which investigator knew the group allocation during the experiment and in assessing outcome included?<br/>If no blinding was done, state so.<br/>Where (section, paragraph #)?</p>                     | <p>No blinding was done.</p>                                                                     |
| <p>6. For experiments in live vertebrates, is a statement of compliance with ethical guidelines/regulations included?<br/>Where (section, paragraph #)?</p>                                                                                  | <p>Yes, Online Methods, Animals.</p>                                                             |
| <p>7. Is the species of the animals used reported?<br/>Where (section, paragraph #)?</p>                                                                                                                                                     | <p>Yes, Online Methods, Animals.</p>                                                             |
| <p>8. Is the strain of the animals (including background strains of KO/transgenic animals used) reported?<br/>Where (section, paragraph #)?</p>                                                                                              | <p>Yes, Online Methods, Animals.</p>                                                             |
| <p>9. Is the sex of the animals/subjects used reported?<br/>Where (section, paragraph #)?</p>                                                                                                                                                | <p>Yes, Online Methods, Animals.</p>                                                             |
| <p>10. Is the age of the animals/subjects reported?<br/>Where (section, paragraph #)?</p>                                                                                                                                                    | <p>Yes, Online Methods, Animals.</p>                                                             |
| <p>11. For animals housed in a vivarium, is the light/dark cycle reported?<br/>Where (section, paragraph #)?</p>                                                                                                                             | <p>Yes, Online, Methods, Animals.</p>                                                            |
| <p>12. For animals housed in a vivarium, is the housing group (i.e. number of animals per cage) reported?<br/>Where (section, paragraph #)?</p>                                                                                              | <p>Not reported.</p>                                                                             |
| <p>13. For behavioral experiments, is the time of day reported (e.g. light or dark cycle)?<br/>Where (section, paragraph #)?</p>                                                                                                             | <p>Not reported.</p>                                                                             |

14. Is the previous history of the animals/subjects (e.g. prior drug administration, surgery, behavioral testing) reported?
- Where (section, paragraph #)?
- Animals used in this study were not used in any other prior experimental procedures. This is stated in Online Methods, Animals.
- a. If multiple behavioral tests were conducted in the same group of animals, is this reported?
- Where (section, paragraph #)?
- Yes, Online Methods, 'Novel appetitive odor detection task' and 'Novel aversive odor detection task'.
15. If any animals/subjects were excluded from analysis, is this reported?
- Where (section, paragraph #)?
- No animals were excluded.
- a. How were the criteria for exclusion defined?
- Where is this described (section, paragraph #)?
- Not applicable
- b. Specify reasons for any discrepancy between the number of animals at the beginning and end of the study.
- Where is this described (section, paragraph #)?
- Not applicable

## ► Reagents

1. Have antibodies been validated for use in the system under study (assay and species)?
- Yes.
- a. Is antibody catalog number given?
- Where does this appear (section, paragraph #)?
- Yes, Online Methods, Tissue processing and immunohistochemistry.
- b. Where were the validation data reported (citation, supplementary information, Antibodypedia)?
- Where does this appear (section, paragraph #)?
- Cereb Cortex. 2015 Sep;25(9):2970-9. doi: 10.1093/cercor/bhu094. Brain Struct Funct. 2013 Jul;218(4):1033-49. doi: 10.1007/s00429-012-0445-y.
2. Cell line identity
- a. Are any cell lines used in this paper listed in the database of commonly misidentified cell lines maintained by [ICLAC](#) and [NCBI Biosample](#)?
- Where (section, paragraph #)?
- not applicable
- b. If yes, include in the Methods section a scientific justification of their use--indicate here in which section and paragraph the justification can be found.
- not applicable

- c. For each cell line, include in the Methods section a statement that specifies:
- the source of the cell lines
  - have the cell lines been authenticated? If so, by which method?
  - have the cell lines been tested for mycoplasma contamination?

Where (section, paragraph #)?

not applicable

## ► Data deposition

Data deposition in a public repository is mandatory for:

- a. Protein, DNA and RNA sequences
- b. Macromolecular structures
- c. Crystallographic data for small molecules
- d. Microarray data

Deposition is strongly recommended for many other datasets for which structured public repositories exist; more details on our data policy are available [here](#). We encourage the provision of other source data in supplementary information or in unstructured repositories such as [Figshare](#) and [Dryad](#).

We encourage publication of Data Descriptors (see [Scientific Data](#)) to maximize data reuse.

1. Are accession codes for deposit dates provided?

Where (section, paragraph #)?

not applicable

## ► Computer code/software

Any custom algorithm/software that is central to the methods must be supplied by the authors in a usable and readable form for readers at the time of publication. However, referees may ask for this information at any time during the review process.

1. Identify all custom software or scripts that were required to conduct the study and where in the procedures each was used.

not applicable

2. If computer code was used to generate results that are central to the paper's conclusions, include a statement in the Methods section under "**Code availability**" to indicate whether and how the code can be accessed. Include version information as necessary and any restrictions on availability.

not applicable

## ► Human subjects

1. Which IRB approved the protocol?

Where is this stated (section, paragraph #)?

not applicable

2. Is demographic information on all subjects provided?

Where (section, paragraph #)?

not applicable

- |                                                                                                                                                 |                |
|-------------------------------------------------------------------------------------------------------------------------------------------------|----------------|
| 3. Is the number of human subjects, their age and sex clearly defined?<br>Where (section, paragraph #)?                                         | not applicable |
| 4. Are the inclusion and exclusion criteria (if any) clearly specified?<br>Where (section, paragraph #)?                                        | not applicable |
| 5. How well were the groups matched?<br>Where is this information described (section, paragraph #)?                                             | not applicable |
| 6. Is a statement included confirming that informed consent was obtained from all subjects?<br>Where (section, paragraph #)?                    | not applicable |
| 7. For publication of patient photos, is a statement included confirming that consent to publish was obtained?<br>Where (section, paragraph #)? | not applicable |

## ► fMRI studies

For papers reporting functional imaging (fMRI) results please ensure that these minimal reporting guidelines are met and that all this information is clearly provided in the methods:

- |                                                                                                                                                                    |                |
|--------------------------------------------------------------------------------------------------------------------------------------------------------------------|----------------|
| 1. Were any subjects scanned but then rejected for the analysis after the data was collected?                                                                      | not applicable |
| a. If yes, is the number rejected and reasons for rejection described?<br>Where (section, paragraph #)?                                                            | not applicable |
| 2. Is the number of blocks, trials or experimental units per session and/or subjects specified?<br>Where (section, paragraph #)?                                   | not applicable |
| 3. Is the length of each trial and interval between trials specified?                                                                                              | not applicable |
| 4. Is a blocked, event-related, or mixed design being used? If applicable, please specify the block length or how the event-related or mixed design was optimized. | not applicable |
| 5. Is the task design clearly described?<br>Where (section, paragraph #)?                                                                                          | not applicable |
| 6. How was behavioral performance measured?                                                                                                                        | not applicable |
| 7. Is an ANOVA or factorial design being used?                                                                                                                     | not applicable |



- a. If not, is this labeled as uncorrected?
20. Are the results based on an ROI (region of interest) analysis?
- a. If so, is the rationale clearly described?
- b. How were the ROI's defined (functional vs anatomical localization)?
21. Is there correction for multiple comparisons within each voxel?
22. For cluster-wise significance, is the cluster-defining threshold and the corrected significance level defined?

## ► Additional comments

---

Additional Comments
